# Supplementary material for: ICH in primary or metastatic brain cancer patients with or without anticoagulant treatment: a systematic review and meta-analysis
Source: PubMed Central journal article supplement — Blood Adv. 2022 Aug 22;6(16):4873–83. doi: 10.1182/bloodadvances.2022008086 (PMC9631668; doi:10.1182/bloodadvances.2022008086), 2022-08-22

## Online Supplement.

**Table S1.** Main clinical features of the included studies.

| Source and author                                              | Mean age                                                                  | Male sex (%)                                                                 | Primary Vs metastasis                | Histotype of cancer                                                                                                                                                                                                             | Concomitant CH | Concomitant RT | Concomitant use of aspirin | ABC criteria | Overall ICH |
|----------------------------------------------------------------|---------------------------------------------------------------------------|------------------------------------------------------------------------------|--------------------------------------|---------------------------------------------------------------------------------------------------------------------------------------------------------------------------------------------------------------------------------|----------------|----------------|----------------------------|--------------|-------------|
| Lee <sup>9</sup><br>Thromb Res<br>2021                         | 62.9 (DOAC)<br>61.8 (LMWH)                                                | 56.4%(DOAC)<br>53.6% (LMWH)                                                  | Primary tumors and brain metastases. | - Primary brain tumors: anaplastic astrocytoma, anaplastic oligodendroglioma, glioma.<br>- Brain metastases: non-small cell lung cancer, breast cancer, genitourinary, renal cell carcinoma, melanoma, gastrointestinal, other. | Yes            | Yes            | No                         | No           | 5/111       |
| Jo <sup>10</sup><br>Neuro Oncol<br>2021                        | 58 for LMWH group, 61 for non-AC with VTE group and 59 for non-VTE group. | 58% for LMWH group, 55% for non-AC with VTE group and 52% for non-VTE group. | Primary brain tumors                 | Glioblastoma, anaplastic glioma.                                                                                                                                                                                                | Yes            | Yes            | Yes                        | No           | 22/110      |
| Dubisnki <sup>11</sup><br>Neurosurgical Review<br>2021         | 65 (DOAC), 68 (LMWH)                                                      | 43% (DOAC), 38% (LMWH)                                                       | Primary brain tumors                 | Glioblastoma                                                                                                                                                                                                                    | Yes            | Yes            | No                         | No           | 0/46        |
| Burth <sup>12</sup><br>J Neurooncol.<br>2021                   | 71 for GBM + AF, 70 for GBM – AF, 71 MET + AF, 71 MET - AF                | 76% GBM + AF, 78% GBM-AF, 67% MET + AF, 67% MET - AF                         | Primary tumors and brain metastases. | Glioblastoma and brain metastases.                                                                                                                                                                                              | Yes            | Yes            | No                         | No           | 22/172      |
| De Melo Junior <sup>13</sup><br>Clin Neurol Neurosurg.<br>2020 | 62                                                                        | 39.6%                                                                        | Primary tumors and brain metastases. | High-grade glioma, grade I meningioma, pituitary adenoma, grade II meningioma, low-grade glioma, brain metastasis.                                                                                                              | No             | No             | No                         | No           | 4/53        |
| Leader <sup>14</sup><br>Blood Adv.<br>2020                     | 66 (DOAC)<br>55 (LMWH)                                                    | 65.9: DOAC<br>50.9 LMWH                                                      | Brain metastases                     | Lung cancer, esophageal cancer.                                                                                                                                                                                                 | No             | Yes            | No                         | Yes          | 11/96       |
| Horstman <sup>15</sup><br>Med Oncol.<br>2018                   | 61.1                                                                      | 45.6%                                                                        | Brain metastases                     | Non-small cell lung cancer, breast cancer, melanoma.                                                                                                                                                                            | Yes            | Yes            | No                         | No           | 12/125      |

|                                                        |                                                                                                                                 |                                                                                                                         |                                           |                                                                                                                                                                                                                                                                         |     |     |     |     |         |
|--------------------------------------------------------|---------------------------------------------------------------------------------------------------------------------------------|-------------------------------------------------------------------------------------------------------------------------|-------------------------------------------|-------------------------------------------------------------------------------------------------------------------------------------------------------------------------------------------------------------------------------------------------------------------------|-----|-----|-----|-----|---------|
| Carney <sup>16</sup><br>J Thromb Haemost. 2018         | -Glioma cohort: 56 years for DOAC and 61 for enoxaparin.<br>- Brain metastases cohort: 66 years for DOAC and 62 for enoxaparin. | - Glioma cohort: 50% for DOAC and 66% for enoxaparin.<br>-Brain metastases cohort: 48% for DOAC and 50% for enoxaparin. | Primary tumors and brain metastases       | Brain metastases or a WHO grade III or IV glioma, including glioblastoma multiforme, anaplastic astrocytoma or anaplastic oligodendroglioma.                                                                                                                            | No  | Yes | Yes | Yes | 67/172  |
| Gessler <sup>17</sup><br>J Neurosurg. 2018             | 54.8 no cerebral vein thrombosis and 47.2 with cerebral vein thrombosis                                                         | 49.4%                                                                                                                   | Primary tumors and brain metastases       | Meningioma, high-grade glioma, low-grade glioma, metastatic tumors and other.                                                                                                                                                                                           | No  | No  | No  | No  | 3/35    |
| Chai-Adisaksopha <sup>18</sup><br>Thromb Haemost. 2017 | Non-brain tumours: 60.3<br>Brain tumours: 60.7                                                                                  | Non-brain tumours: 45.6%<br>Brain tumours: 45.6%                                                                        | Primary tumors and brain metastases       | Astrocytoma, glioblastoma, oligodendroglioma, ependymoma, medulloblastoma, supratentorial, primitive neuroectodermal tumour.<br>- Primary cancer site: brain, colorectal, lung, breast, lymphoma, ovary, bladder, stomach, head and neck, pancreas, sarcoma and others. | Yes | Yes | Yes | No  | 9/182   |
| Mantia <sup>19</sup><br>Blood. 2017                    | 62 (enoxaparin) and 61 control                                                                                                  | 66% (enoxaparin) and 58% (control group)                                                                                | Primary brain tumors                      | Glioblastoma (84%), anaplastic oligodendroglioma (10%), anaplastic astrocytoma (5%)                                                                                                                                                                                     | No  | No  | Yes | Yes | 25/133  |
| Al Megren <sup>20</sup><br>Thromb Res. 2017            | 59                                                                                                                              | 72%                                                                                                                     | Primary brain tumors                      | Glioma                                                                                                                                                                                                                                                                  | Yes | No  | No  | No  | 13/152  |
| Khoury <sup>21</sup><br>Neurooncol Pract. 2016         | 65                                                                                                                              | 61.8%                                                                                                                   | Primary brain tumors                      | Glioblastoma (WHO grade IV)                                                                                                                                                                                                                                             | Yes | Yes | No  | No  | 17/173  |
| Donato <sup>3</sup><br>Blood. 2015                     | 60.9 (enoxaparin) and 60 (controls)                                                                                             | 52.9% (enoxaparin) and 49.7% (controls)                                                                                 | Brain metastases                          | Non-small cell lung cancer, breast cancer, renal cell carcinoma, melanoma, colorectal cancer, small cell lung cancer.                                                                                                                                                   | Yes | Yes | yes | Yes | 116/293 |
| Smith <sup>22</sup><br>J Clin Neurosci. 2015           | 54.2                                                                                                                            | 46.8%                                                                                                                   | Primary brain tumors and brain metastases | High-grade glioma, metastases, meningioma, low-grade glioma.                                                                                                                                                                                                            | No  | No  | Yes | No  | 2/69    |
| Yust-Katz <sup>23</sup><br>J Neurooncol. 2015          | 56                                                                                                                              | NR                                                                                                                      | Primary brain tumors                      | Glioblastoma                                                                                                                                                                                                                                                            | Yes | Yes | No  | No  | 3/64    |
| Chaichana <sup>24</sup><br>Neurol Res.                 | 51.6 ± 14.7                                                                                                                     | NR                                                                                                                      | Primary brain tumors and                  | Glioma, glioblastoma WHO grade IV, anaplastic WHO                                                                                                                                                                                                                       | No  | No  | No  | No  | 5/126   |

|                                                        |                                                                        |                                                            |                                            |                                                                                                     |     |     |     |    |        |
|--------------------------------------------------------|------------------------------------------------------------------------|------------------------------------------------------------|--------------------------------------------|-----------------------------------------------------------------------------------------------------|-----|-----|-----|----|--------|
| 2013                                                   |                                                                        |                                                            | brain metastases                           | grade III, WHO grade II, metastatic tumours, meningiomas, schwannomas.                              |     |     |     |    |        |
| Aishima <sup>25</sup><br>Br J Neurosurg.<br>2013       | 50.6 ± 18.5                                                            | 50.6%                                                      | Primary brain tumors and brain metastases  | Glioma, lymphoma, metastatic brain tumours, meningioma, pituitary adenoma, schwannoma and other.    | No  | No  | No  | No | 5/23   |
| Alvarado <sup>26</sup><br>Melanoma Res.<br>2012        | NR                                                                     | NR                                                         | Brain metastases                           | Melanoma                                                                                            | No  | No  | No  | No | 2/74   |
| Norden <sup>4</sup><br>J Neurooncol.<br>2011           | 55.5                                                                   | 75%                                                        | Primary tumours                            | Glioblastoma, anaplastic astrocytoma, low-grade glioma.                                             | No  | No  | No  | No | 13/282 |
| Pan <sup>27</sup><br>Anticancer Res.<br>2009           | 59                                                                     | NR                                                         | Primary and brain metastases               | High-grade gliomas.                                                                                 | No  | No  | Yes | No | 3/146  |
| Nghiempu <sup>28</sup><br>Neuro Oncol.<br>2008         | NR                                                                     | NR                                                         | Primary tumors                             | Oligodendroglioma, glioblastomas, gliomas                                                           | Yes | No  | No  | No | 12/265 |
| Ghanim <sup>29</sup><br>J Thromb Thrombolysis.<br>2007 | 56 ± 12 for anticoagulants group and 59 ± 15 for filter group          | 48.7% for anticoagulants group and 52.2% for filter group. | Primary brain tumors and brain metastases  | Astrocytoma, glioblastoma and other.                                                                | No  | No  | No  | No | 51/176 |
| Schiff <sup>5</sup><br>Cancer.<br>1994                 | 58 (all patient), 59 (anticoagulated patients) and 55 (filter patient) | 58.8%                                                      | Brain metastases                           | Non-small cell lung, breast, melanoma, melanoma and CML, small cell lung, renal, systemic lymphoma. | No  | Yes | No  | No | 6/42   |
| Quevedo <sup>30</sup> Mayo Clin Proc.<br>1994          | NR                                                                     | NR                                                         | Primary brain tumors                       | Grade 3 or 4 astrocytoma, mixed astrocytoma-oligodendroglioma or gliosarcoma.                       | Yes | Yes | Yes | No | 1/18   |
| Altschuler <sup>31</sup><br>Neurosurgery.<br>1990      | 57                                                                     | 43.47%                                                     | Primary brain tumors.                      | Malignant astrocytoma, glioblastoma.                                                                | No  | No  | No  | No | 0/23   |
| Olin <sup>32</sup><br>Arch Intern Med.<br>1987         | 52.8                                                                   | 60%                                                        | Primary brain tumours and brain metastases | Astrocytoma, meningioma, schwannoma, metastatic brain tumours (lung, melanoma)                      | Yes | No  | No  | No | 1/49   |
| Choucair <sup>33</sup><br>J Neurosurg.<br>1987         | 32-66                                                                  | NR                                                         | Primary tumors                             | Malignant gliomas                                                                                   | Yes | Yes | No  | No | 0/36   |
| Ruff <sup>34</sup><br>Ann Neurol.<br>1983              | NR                                                                     | 52.23%                                                     | Primary tumors                             | Malignant astrocytoma or glioblastoma multiforme.                                                   | Yes | Yes | No  | No | 7/266  |

|                                                         |    |    |                |                   |     |     |    |    |       |
|---------------------------------------------------------|----|----|----------------|-------------------|-----|-----|----|----|-------|
| Ruff <sup>35</sup><br>Trans Am Neurol<br>Assoc.<br>1981 | NR | NR | Primary tumors | Malignant gliomas | Yes | Yes | No | No | 8/381 |
|---------------------------------------------------------|----|----|----------------|-------------------|-----|-----|----|----|-------|

**Abbreviations:** *CH*, chemotherapy; *RT*, radiotherapy; *ICH*, intracerebral haemorrhage; *DOAC*, direct oral anticoagulant; *LMWH*, low molecular weight heparin; *AC*, anticoagulation; *VTE*, venous thromboembolism; *GMB*, glioblastoma; *AT*, atrial fibrillation; *MET*, brain metastases; *CVT*, cerebral vein and dural sinus thrombosis; *WHO*, World Health Organisation; *GB*, glioblastoma; *CNS*, Central nervous system; *CML*, chronic myelogenous leukemia; *NR*, not reported.

**Table S2.** Quality assessment according to the NOS scale

| Study                 | Selection |   |   |   | Comparability | Outcome |   |   | TOTAL | QUALITY     |
|-----------------------|-----------|---|---|---|---------------|---------|---|---|-------|-------------|
|                       | 1         | 2 | 3 | 4 |               | 1       | 2 | 3 |       |             |
| Lee, 2021             | *         | * | * | * | *             |         | * | * | 4,1,2 | <b>Good</b> |
| Jo, 2021              | *         | * | * | * | *             |         | * | * | 4,1,2 | <b>Good</b> |
| Dubinski, 2021        | *         | * | * | * | *             |         | * | * | 4,1,2 | <b>Good</b> |
| Burth,2021            | *         | * |   | * | *             |         | * | * | 3,1,2 | <b>Good</b> |
| De Melo Junior,2020   | *         | * | * | * |               |         | * |   | 4,0,1 | <b>Poor</b> |
| Leader,2020           | *         | * |   | * | *             |         | * | * | 3,1,2 | <b>Good</b> |
| Horstman, 2018        | *         | * |   | * | *             |         | * |   | 3,1,1 | <b>Poor</b> |
| Carney,2018           | *         | * |   | * | *             |         |   |   | 3,1,0 | <b>Poor</b> |
| Gessler,2018          | *         | * | * | * | *             |         | * |   | 4,1,1 | <b>Poor</b> |
| Chai-Adisaksopha,2017 | *         | * |   | * | *             |         | * |   | 3,1,1 | <b>Poor</b> |
| Mantia,2017           | *         | * |   | * | *             |         |   |   | 3,1,0 | <b>Poor</b> |
| Al Megren,2017        | *         | * |   | * | *             |         | * | * | 3,1,2 | <b>Good</b> |

|                 |   |   |   |   |   |  |   |   |       |             |
|-----------------|---|---|---|---|---|--|---|---|-------|-------------|
| Khoury,2016     | * | * |   | * | * |  | * |   | 3,1,1 | <b>Poor</b> |
| Donato,2015     | * | * |   | * | * |  | * |   | 3,1,1 | <b>Poor</b> |
| Smith,2015      | * | * | * | * | * |  | * |   | 4,1,1 | <b>Poor</b> |
| Yust-Katz,2015  | * | * |   | * | * |  |   |   | 3,1,0 | <b>Poor</b> |
| Chaichana,2013  | * | * | * | * | * |  | * |   | 4,1,1 | <b>Poor</b> |
| Aishima,2013    | * | * |   | * | * |  |   |   | 3,1,0 | <b>Poor</b> |
| Alvarado,2012   | * | * |   | * |   |  | * |   | 3,0,1 | <b>Poor</b> |
| Norden,2011     | * | * | * | * | * |  |   |   | 4,1,0 | <b>Poor</b> |
| Pan,2009        | * | * |   | * |   |  | * |   | 3,0,1 | <b>Poor</b> |
| Nghiemphu,2008  | * | * |   | * | * |  | * |   | 3,1,1 | <b>Poor</b> |
| Ghanim,2007     | * | * |   | * | * |  | * |   | 3,1,1 | <b>Poor</b> |
| Schiff,1994     | * | * |   | * | * |  | * | * | 3,1,2 | <b>Good</b> |
| Quevedo,1994    | * | * |   | * |   |  |   |   | 3,0,0 | <b>Poor</b> |
| Altschuler,1990 | * |   |   |   |   |  |   |   | 1,0,0 | <b>Poor</b> |
| Olin,1987       | * | * |   | * |   |  |   |   | 3,0,0 | <b>Poor</b> |
| Choucair,1987   | * | * |   | * |   |  |   |   | 3,0,0 | <b>Poor</b> |
| Ruff,1983       | * | * |   | * | * |  | * |   | 3,1,1 | <b>Poor</b> |
| Ruff,1981       | * | * |   |   |   |  |   |   | 2,0,0 | <b>Poor</b> |

**Table S3.** Description of the studies included according to: n° of ICH according to the type of tumor, VTE progression, N° of ICH during radiotherapy.

| <b>Study Name</b>     | <b>N° ICH according to the type of tumor</b>                                                      | <b>VTE progression/death from PE</b>                                                                                                                                                                                                                                                                                                                                                                                                                                                             | <b>N° of ICH after radiation</b>                                                                    |
|-----------------------|---------------------------------------------------------------------------------------------------|--------------------------------------------------------------------------------------------------------------------------------------------------------------------------------------------------------------------------------------------------------------------------------------------------------------------------------------------------------------------------------------------------------------------------------------------------------------------------------------------------|-----------------------------------------------------------------------------------------------------|
| Lee, 2021             | NR                                                                                                | 6-month recurrent VTE: 5.6% DOAC group (55 patients) and 6.6% in LMWH group (56 patients). Any recurrent VTE event: 3 of 55 patients in the DOAC group compared to 3 of 56 patients in the LMWH group.<br><br>Primary brain tumors cohort: recurrent VTE events occurred in 1/14 patients in the DOAC group and 1/12 patients in the LMWH group.<br><br>Secondary brain metastases cohort: recurrent VTE events occurred in 2/41 patients in the DOAC group and 2/44 patients in the LMWH group. | 55/111 received RT. Not reported N° of ICH in these patients                                        |
| Jo, 2021              | Only primary brain tumors                                                                         | NR                                                                                                                                                                                                                                                                                                                                                                                                                                                                                               | NR                                                                                                  |
| Dubinski, 2021        | Only primary brain tumors                                                                         | Re-embolism: 0/46.<br>Re-thrombosis: 1/46.                                                                                                                                                                                                                                                                                                                                                                                                                                                       | NR                                                                                                  |
| Burth,2021            | NR                                                                                                | NR                                                                                                                                                                                                                                                                                                                                                                                                                                                                                               | NR                                                                                                  |
| De Melo Junior,2020   | NR                                                                                                | NR                                                                                                                                                                                                                                                                                                                                                                                                                                                                                               | Excluded.                                                                                           |
| Leader,2020           | Lung: 7/54<br>Renal cell carcinoma: 2/5<br>Thymic NEC:1                                           | NR                                                                                                                                                                                                                                                                                                                                                                                                                                                                                               | NR                                                                                                  |
| Horstman, 2018        | 6/64 patients with NSCLC<br>2/4 patients with renal cell carcinoma.<br>2/9 patients with melanoma | NR                                                                                                                                                                                                                                                                                                                                                                                                                                                                                               | 9/108 developed ICH with treatment (not specified type of treatment)                                |
| Carney,2018           | NR                                                                                                | NR                                                                                                                                                                                                                                                                                                                                                                                                                                                                                               | NR                                                                                                  |
| Gessler,2018          | NR                                                                                                | 3/35 patients with CVT died at the 3-month follow-up.                                                                                                                                                                                                                                                                                                                                                                                                                                            | Excluded.                                                                                           |
| Chai-Adisaksopha,2017 | NR.                                                                                               | Recurrent VTE: 11.0 per 100 patient-year in patients with brain tumors and 13.5 per 100 patient-years in those without known brain tumors.                                                                                                                                                                                                                                                                                                                                                       | 62.5% of intracranial bleeds occurred in patients who received combination chemo-radiation therapy. |
| Mantia,2017           | Only primary brain tumors.                                                                        | NR                                                                                                                                                                                                                                                                                                                                                                                                                                                                                               | Excluded.                                                                                           |
| Al Megren,2017        | Only primary brain tumors.                                                                        | 0/76                                                                                                                                                                                                                                                                                                                                                                                                                                                                                             | Excluded.                                                                                           |

|                 |                                                                                                                                                                                                                                                                                                                                                                                                                                                                                          |                                                                                                                                                                                                                                                                                                                                                                                                                              |                                                                               |
|-----------------|------------------------------------------------------------------------------------------------------------------------------------------------------------------------------------------------------------------------------------------------------------------------------------------------------------------------------------------------------------------------------------------------------------------------------------------------------------------------------------------|------------------------------------------------------------------------------------------------------------------------------------------------------------------------------------------------------------------------------------------------------------------------------------------------------------------------------------------------------------------------------------------------------------------------------|-------------------------------------------------------------------------------|
|                 |                                                                                                                                                                                                                                                                                                                                                                                                                                                                                          | There was no recurrent VTE.                                                                                                                                                                                                                                                                                                                                                                                                  |                                                                               |
| Khoury,2016     | Only primary brain tumors.                                                                                                                                                                                                                                                                                                                                                                                                                                                               | NR                                                                                                                                                                                                                                                                                                                                                                                                                           | 4/39                                                                          |
| Donato,2015     | NR                                                                                                                                                                                                                                                                                                                                                                                                                                                                                       | NR                                                                                                                                                                                                                                                                                                                                                                                                                           | NR                                                                            |
| Smith,2015      | NR                                                                                                                                                                                                                                                                                                                                                                                                                                                                                       | NR                                                                                                                                                                                                                                                                                                                                                                                                                           | Excluded                                                                      |
| Yust-Katz,2015  | Only primary brain tumors.                                                                                                                                                                                                                                                                                                                                                                                                                                                               | 1/64 had 2 events (VTE).                                                                                                                                                                                                                                                                                                                                                                                                     | NR.                                                                           |
| Chaichana,2013  | NR.                                                                                                                                                                                                                                                                                                                                                                                                                                                                                      | NR                                                                                                                                                                                                                                                                                                                                                                                                                           | Excluded                                                                      |
| Aishima,2013    | NR.                                                                                                                                                                                                                                                                                                                                                                                                                                                                                      | 1 patient in group A (191 patients) died of recurrent PE and ICH.                                                                                                                                                                                                                                                                                                                                                            | Excluded                                                                      |
| Alvarado,2012   | NR                                                                                                                                                                                                                                                                                                                                                                                                                                                                                       | NR                                                                                                                                                                                                                                                                                                                                                                                                                           | Excluded                                                                      |
| Norden,2011     | Only primary brain tumors.                                                                                                                                                                                                                                                                                                                                                                                                                                                               | NR.                                                                                                                                                                                                                                                                                                                                                                                                                          | Excluded.                                                                     |
| Pan,2009        | Only primary brain tumors.                                                                                                                                                                                                                                                                                                                                                                                                                                                               | 7/41<br>7 of the 41 VTE patients developed recurrent VTE.                                                                                                                                                                                                                                                                                                                                                                    | Excluded.                                                                     |
| Nghiemphu,2008  | Only primary brain tumors.                                                                                                                                                                                                                                                                                                                                                                                                                                                               | NR                                                                                                                                                                                                                                                                                                                                                                                                                           | Excluded.                                                                     |
| Ghanim,2007     | NR                                                                                                                                                                                                                                                                                                                                                                                                                                                                                       | NR                                                                                                                                                                                                                                                                                                                                                                                                                           | Excluded.                                                                     |
| Schiff,1994     | 6/42 ICH (3 symptomatic and 3 asymptomatic).<br><br>3 symptomatic:<br>1 patient with frontal metastasis from breast cancer treated with radiation therapy.<br>-1 patient who had received radiation therapy for two metastases from non-small cell lung cancer.<br>-1 patient with multiple brain metastases from non-small cell lung cancer treated with radiation therapy<br>-3 asymptomatic: with brain metastases from melanoma, breast carcinoma and non-small cell lung carcinoma. | 4/10 patients treated with Greenfield filters had recurrent nonfatal thromboembolic events (2 PE and 2 DVT). 2/51 patients were untreated for DVT and died of PE.<br><br>5/42 patients were diagnosed as having recurrent nonfatal episodes of venous thromboembolism while receiving anticoagulation (1 patient with DVT experienced a PE, 3 patients experienced recurrent DVT and 1 patient experienced both DVT and PE). | 3 ICH during radiotherapy. Not reported N° of patients received radiotherapy. |
| Quevedo,1994    | Only primary brain tumors.                                                                                                                                                                                                                                                                                                                                                                                                                                                               | NR                                                                                                                                                                                                                                                                                                                                                                                                                           | NR                                                                            |
| Altschuler,1990 | Only primary brain tumors.                                                                                                                                                                                                                                                                                                                                                                                                                                                               | 1 patient had a PE secondary to a very extensive DVT (recurrent PE but not fatal).                                                                                                                                                                                                                                                                                                                                           | Excluded.                                                                     |
| Olin,1987       | NR                                                                                                                                                                                                                                                                                                                                                                                                                                                                                       | NR                                                                                                                                                                                                                                                                                                                                                                                                                           | Excluded.                                                                     |

|               |                            |                                                                                                                                              |                                             |
|---------------|----------------------------|----------------------------------------------------------------------------------------------------------------------------------------------|---------------------------------------------|
| Choucair,1987 | Only primary brain tumors. | 10/27 patients with PE died suddenly.                                                                                                        | 0 of 6 patients had ICH during RT treatment |
| Ruff,1983     | Only primary brain tumors. | 1 patient with phlebitis taking anticoagulants developed PE (non-fatal).<br>3 of the 6 conservatively treated patients died of PE.           | NR                                          |
| Ruff,1981     | Only primary brain tumors. | 1/97<br>95 of 97 patients with phlebitis were anticoagulated. 1 of the 2 conservatively treated patients died of bilateral pulmonary emboli. | NR                                          |

**Abbreviations:** NR: not reported, VTE: venous thromboembolism, DVT: deep vein thrombosis, PE: pulmonary embolism, CVT: cerebral vein thrombosis, ICH: intracranial hemorrhage.



**Figure S1.** The flow-diagram of the research strategy

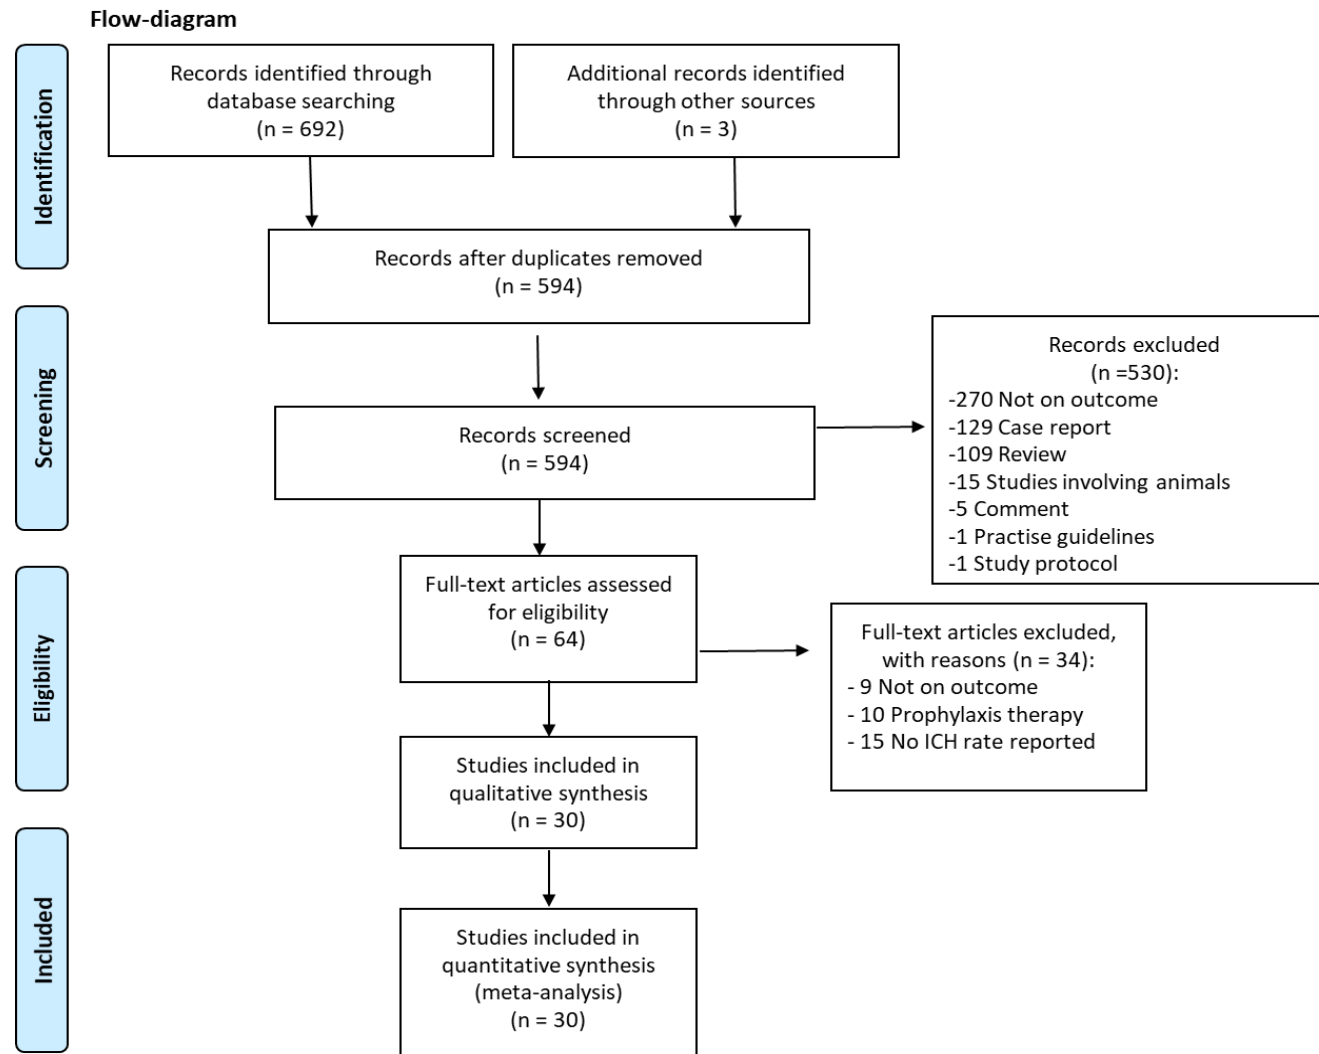

**Figure S2.** Bias assessment plot in Panel A (rate of ICH in primary and metastases brain cancers), Panel B (rate of ICH in primary brain cancer), Panel C (rate of ICH in brain metastases).

**Panel A**

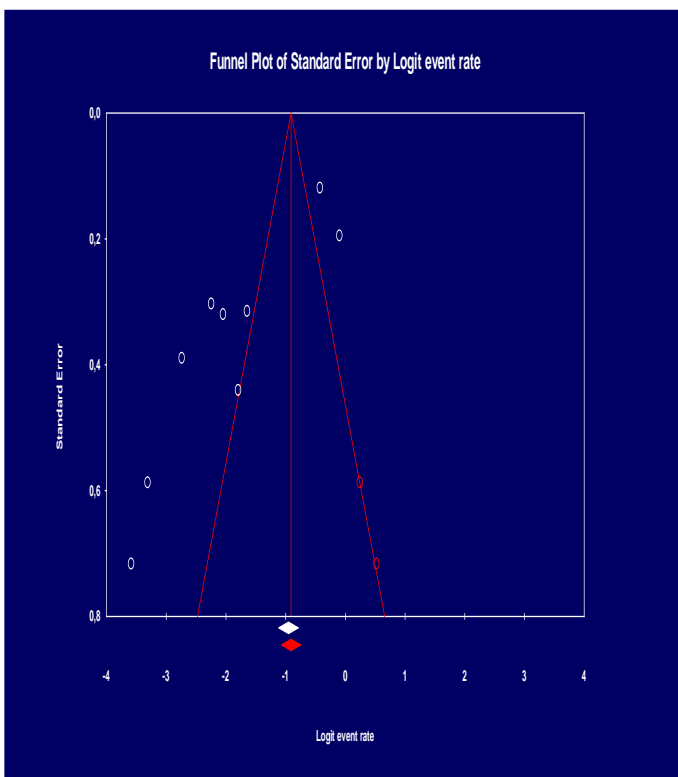

**Panel B**

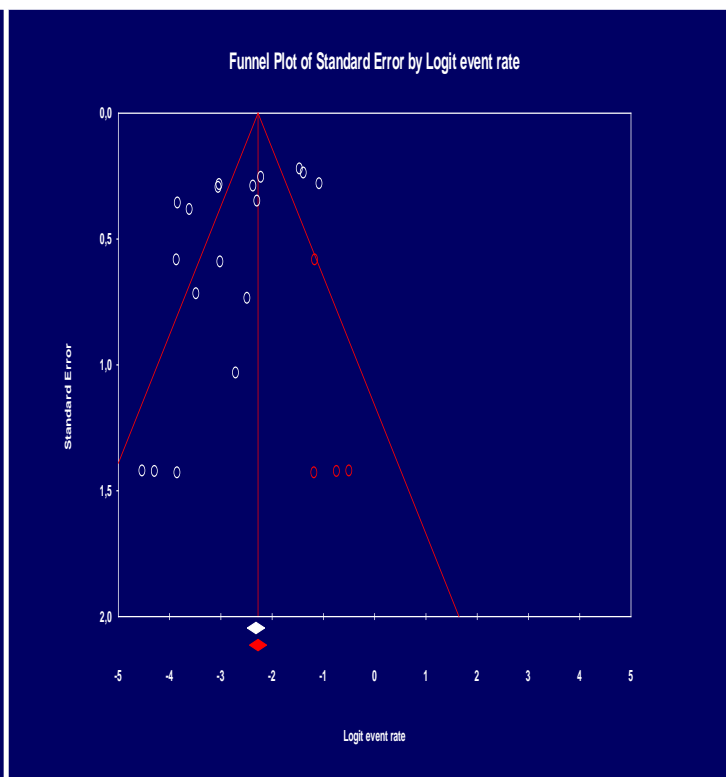

**Panel C**

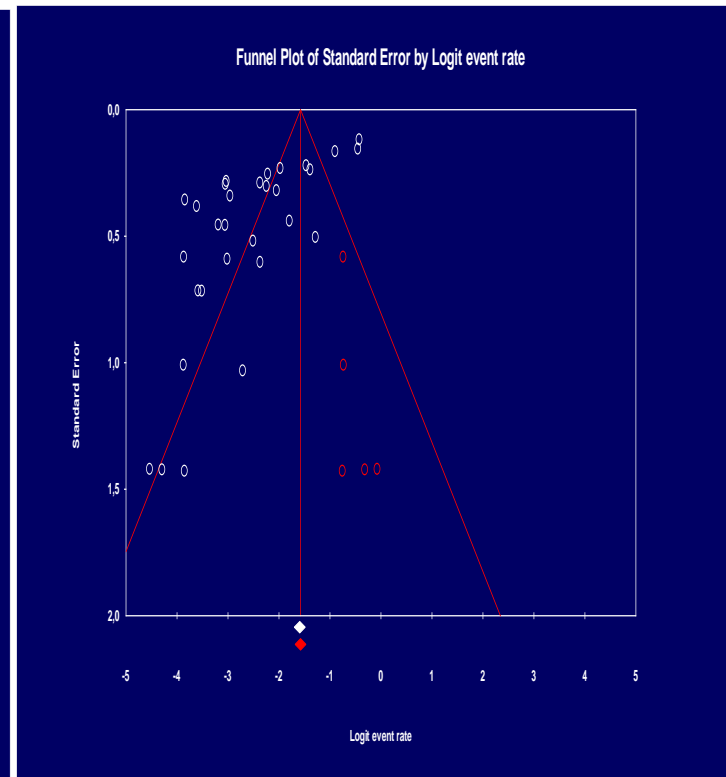

**Figure S3.** Rate of ICH in primary brain cancer only (panel A) and rate of ICH in metastatic brain tumors (panel B)

**Panel A**

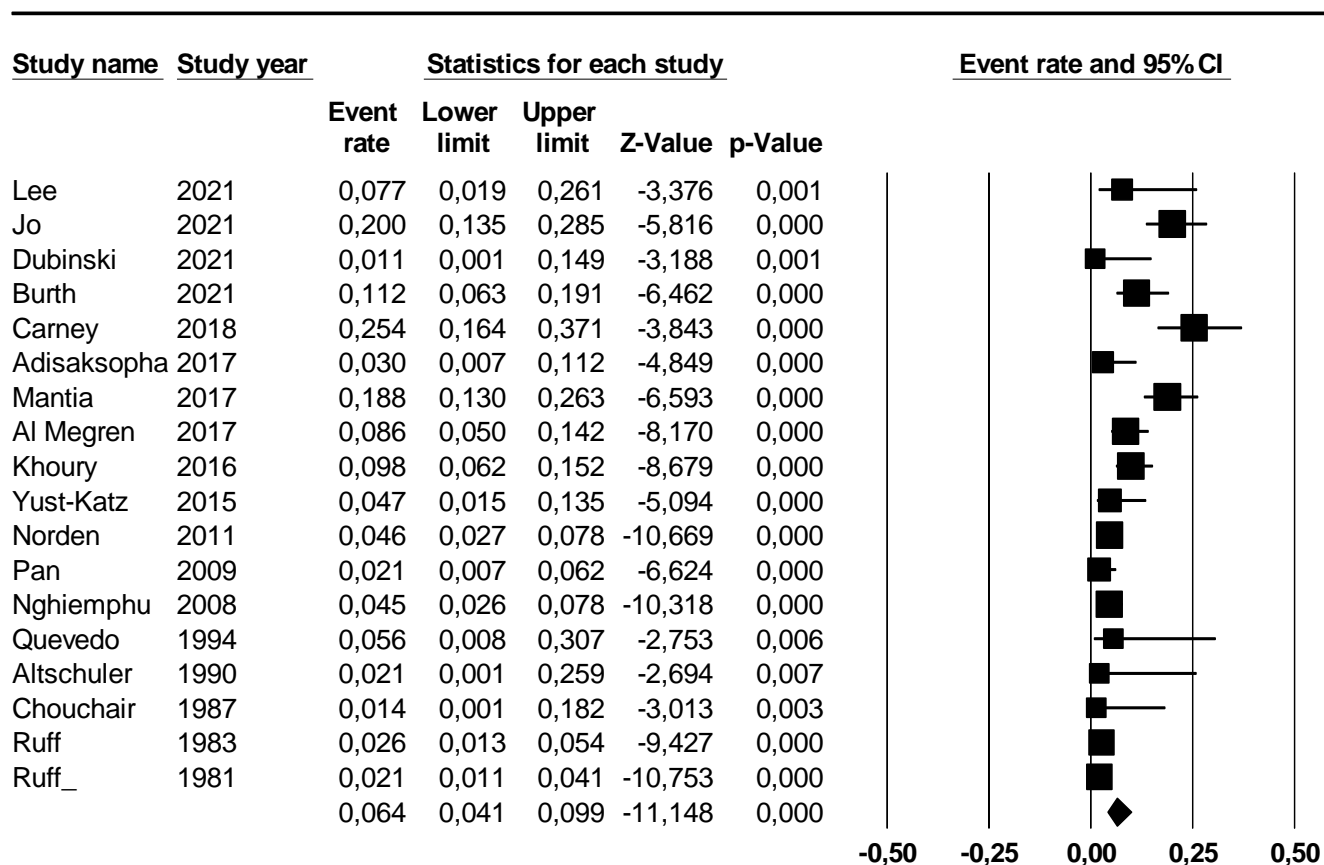

**Panel B**

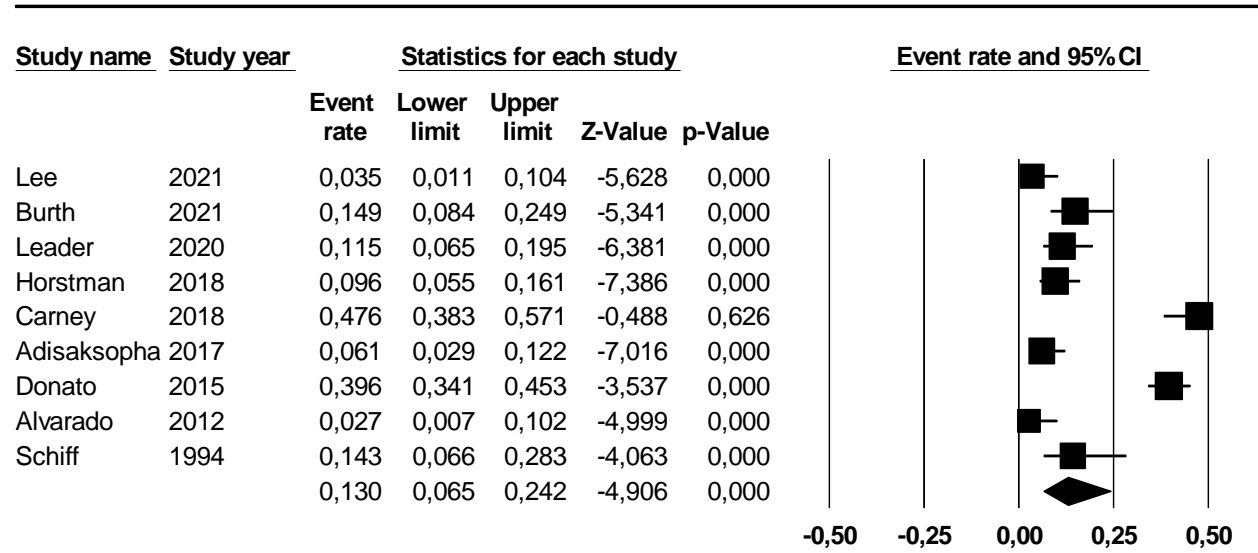

**Figure S4.** Risk of ICH in patients with primary and metastatic brain cancers treated with DOACs versus LMWH (Panel A) and with warfarin versus LMWH (Panel B)

**Panel A**

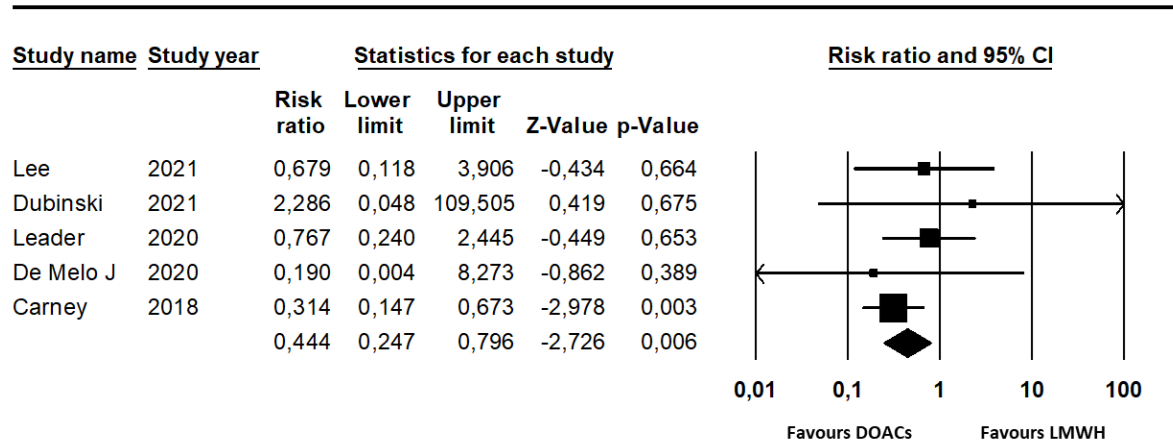

**Panel B**

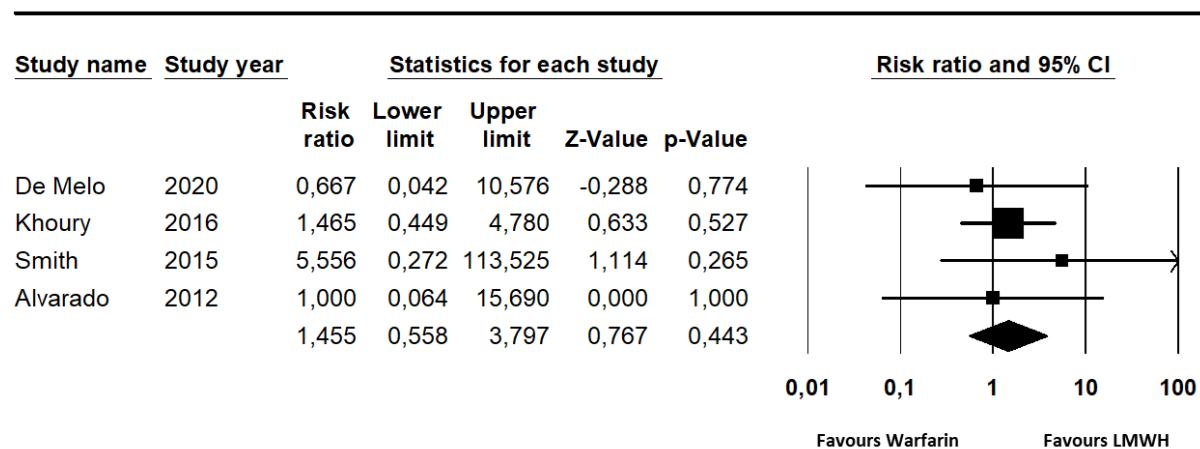

Supplement: advancesADV2022008086-suppl1.pdf [file advancesADV2022008086-suppl1.pdf]
